# Supplementary material for: Synthesis of Historical Reservoir Operations from 1980 – 2020 for the Evaluation of Reservoir Representation in Large Scale Hydrologic Models
Source: Copernicus journal article supplement (doi:10.5194/hess-2023-194), 2023-09-19

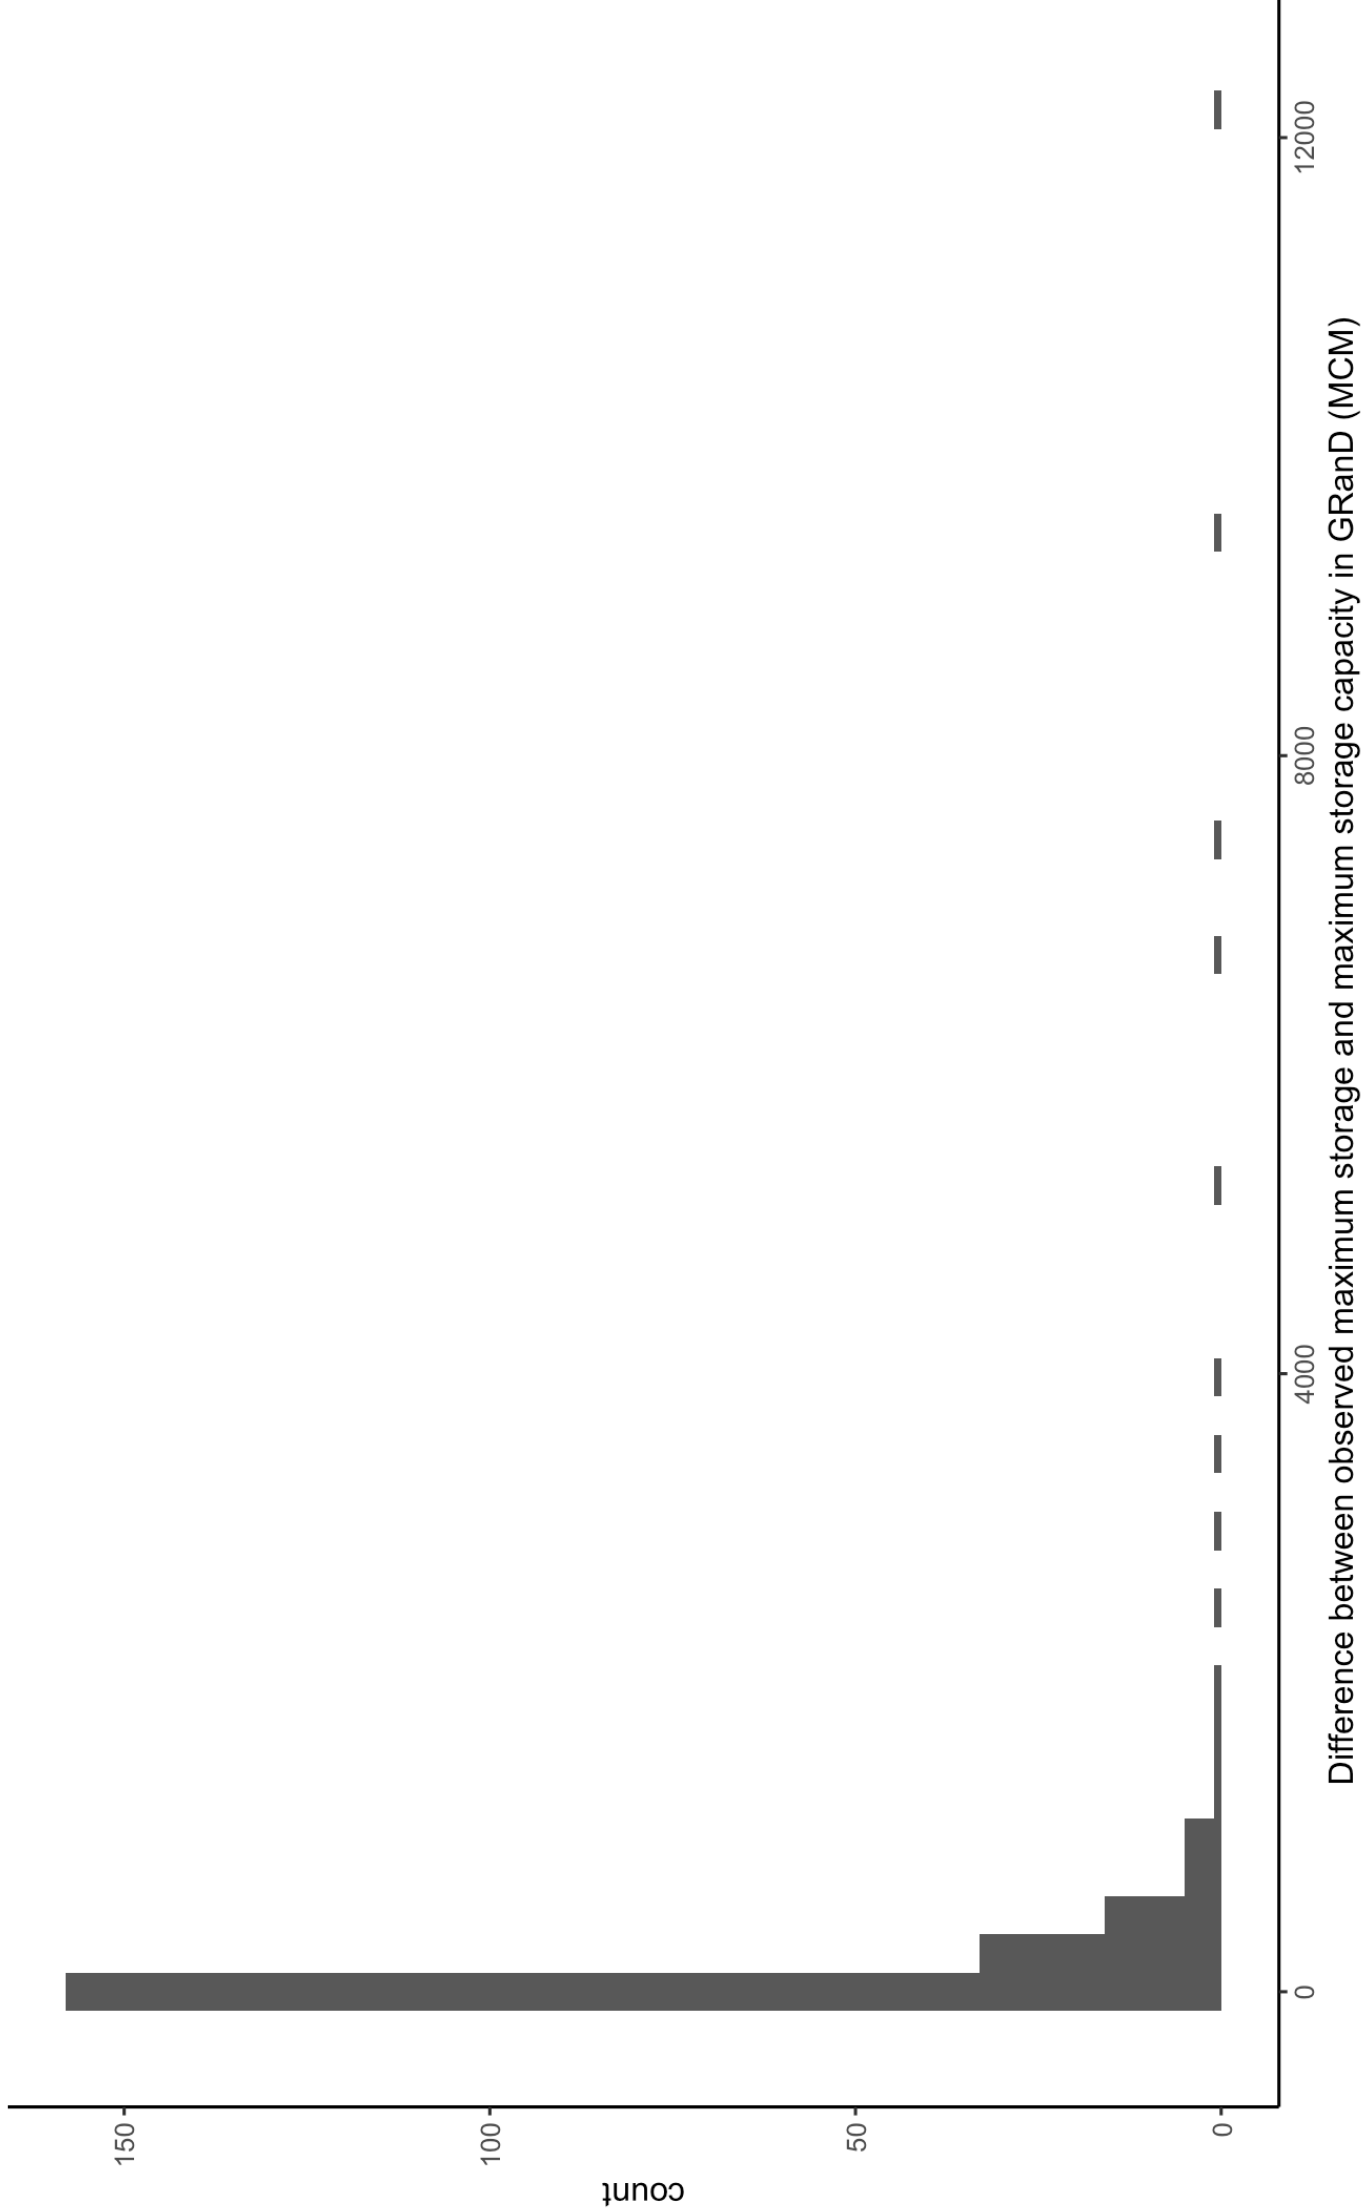

Supplement: Supplementary file [file hess-2023-194-AC3-supplement.pdf]
